1           Depth of sedation with dexmedetomidine modulates cortical excitability non-linearly

2

3 Authors: Paolo Cardone<sup>1,2\*</sup>, Olivier Bodart<sup>1,2,3\*</sup>, Murielle Kirsch<sup>4,5</sup>, Julien Sanfilippo<sup>4</sup>, Alessandra  
4 Virgillito<sup>6</sup>, Charlotte Martial<sup>1,2</sup>, Jessica Simon<sup>7</sup>, Sarah Wannez<sup>1</sup>, Robert D. Sanders<sup>8,9</sup>, Steven  
5 Laureys<sup>1,2</sup>, Marcello Massimini<sup>10,11</sup>, Vincent Bonhomme<sup>4,5,12\*</sup>, Olivia Gosseries<sup>1,2\*</sup>

6

7 <sup>1</sup>Coma Science Group, GIGA-Consciousness, University of Liège, Liège, Belgium

8 <sup>2</sup>Centre du Cerveau<sup>2</sup>, University Hospital of Liège, Liège, Belgium

9 <sup>3</sup>Department of Neurology, University Hospital of Liège, Liège, Belgium

10 <sup>4</sup>Anesthesia and Intensive Care Laboratory, GIGA-Consciousness, University of Liège, Liège,  
11 Belgium

12 <sup>5</sup>Department of Anaesthesia and Intensive Care Medicine, University Hospital of Liège, Liège,  
13 Belgium

14 <sup>6</sup>Department of Rehabilitation, ASL Toscana Nordovest, Italy

15 <sup>7</sup>Psychology and Neuroscience of Cognition, University of Liège, Liège, Belgium

16 <sup>8</sup>Specialty of Anaesthetics, University of Sydney, Camperdown, Australia

17 <sup>9</sup>Department of Anaesthetics & Institute of Academic Surgery, Royal Prince Alfred Hospital,  
18 Camperdown, Australia

19 <sup>10</sup>Department of Biomedical and Clinical Sciences “L. Sacco”, Università degli Studi di Milano,  
20 Milan, Italy

21 <sup>11</sup>IRCCS Fondazione Don Gnocchi, Milan, Italy

22 <sup>12</sup>University Department of Anaesthesia and Intensive Care Medicine, Centre Hospitalier Régional  
23 de la Citadelle (CHR Citadelle), Liège, Belgium

24 \* Contributed equally

25

26 Corresponding authors:

27 Olivia Gosseries

28 Coma Science Group, GIGA-Consciousness

29 Avenue de l'hôpital 1

30 4000 Liege

31 Belgium

32 [ogosseries@uliege.be](mailto:ogosseries@uliege.be)

33

34 Keywords: Anaesthesia, Dexmedetomidine, TEP, TMS-Evoked Potential, Consciousness,

35 Responsiveness, TMS, TMS-hdEEG

## 36 Abstract

### 37 Background

38 Cortical excitability changes across conscious states, being higher in unconsciousness compared to  
39 normal wakefulness. Anaesthesia offers controlled manipulation to investigate conscious processes  
40 and underlying brain dynamics. Among commonly used anaesthetic agents, dexmedetomidine  
41 (DEX) effects are not completely known. In this study, we investigated cortical excitability as a  
42 function of DEX sedation depth.

### 43 Methods

44 Transcranial magnetic stimulation coupled with electroencephalography was recorded in 20 healthy  
45 subjects undergoing DEX sedation in four conditions (baseline, light sedation, deep sedation,  
46 recovery). Frontal and parietal cortices were stimulated using a neuronavigation system. Cortical  
47 excitability was inferred by slope, amplitude, positive and negative peak latencies of the first  
48 component (0-30 ms) of the TMS-evoked potential. Four Generalized Linear Mixed Models  
49 (GLMM) were used to test the effect of condition and brain region over cortical excitability.

### 50 Results

51 Dexmedetomidine modulated amplitude ( $P < 0.001$ ), slope ( $P = 0.0001$ ) and positive peak ( $P = 0.042$ ),  
52 while the targeted brain region affected amplitude ( $P < 0.001$ ), slope ( $P < 0.001$ ), and negative peak  
53 ( $P = 0.001$ ). The interaction between dexmedetomidine and region had an effect over amplitude  
54 ( $P = 0.004$ ), and slope ( $P = 0.009$ ) such that cortical excitability was higher during all conditions  
55 where DEX was present as compared to the baseline.

### 56 Conclusions

57 Cortical excitability changes non-linearly as a function of the depth of DEX sedation, with a  
58 paradoxical non dose-dependent increase. The effect is region-specific, being present in the frontal  
59 but not in the parietal region. Future research should extend the current results with other  
60 anaesthetics to better understand the link between cortical excitability and depth of sedation.

## 61 Introduction

62 Anaesthesia offers a unique medium to unveil consciousness mechanisms, modulating reversibly  
63 different aspects of consciousness states, depending on the nature of the drug and its dosage (for a  
64 recent review, see<sup>1</sup>). When an anaesthetic agent leads to an alteration of consciousness, it impacts  
65 the brain functioning in its complexity<sup>2</sup>, connectivity<sup>3</sup>, and frequency range<sup>4</sup>. After regaining  
66 consciousness, people might experience emergence agitation, postoperative delirium, a cognitive  
67 disorder characterised by anxiety, cognitive alterations, and/or hypo- or hyperactivity.<sup>5</sup>

68 Dexmedetomidine (DEX) is an  $\alpha_2$ -adrenoceptor agonist that has the potential of reducing the  
69 incidence of emergence agitation<sup>6</sup> and postoperative delirium compared to other anaesthetic  
70 agents<sup>7</sup>. The reasons for these phenomena are still unclear. The anxiolytic, analgesic and opioid  
71 sparing properties of the molecule, as well as the absence of anticholinergic effects, improvement of  
72 sleep quality, and eventually attenuation of postoperative inflammation have been advocated to  
73 explain the reduction in the incidence of postoperative delirium<sup>8</sup>. Moreover, a possible quicker  
74 transition between brain states and quicker restoration of cortical communication might explain the  
75 positive effect on emergence agitation. Through its inhibiting effect on the locus coeruleus, DEX  
76 reduces the inhibition of the ventrolateral preoptic nucleus (VLPO) of the hypothalamus, which in  
77 turn exerts GABAergic inhibition of cortical arousal nuclei. This effect on subcortical sleep systems  
78 promotes a state similar to stage 2/3 non-REM sleep.<sup>9-11</sup> After DEX intake, cortical and subcortical  
79 regions glucose consumption decreases, which correlates with the functional connectivity  
80 impairment in intrinsic consciousness networks, as well as between the thalamus and cortical  
81 regions within those networks.<sup>11 12</sup> Network topology is also modified by DEX.<sup>13</sup> Interestingly, the  
82 cortico-cortical connectivity remains partially preserved during deep sedation.<sup>12</sup> This asymmetry  
83 between cortical and subcortical regions might account for partially preserved semantic processing  
84 of incoming stimuli after the loss of responsiveness, as indexed by electroencephalography  
85 (EEG).<sup>14</sup> Also, functional connectivity between the thalamus and key structures of arousal and

86 saliency detection networks is relatively preserved during DEX-induced deep sedation, which may  
87 explain the ability to rapidly restore responsiveness by vigorous external stimulation. Thus,  
88 responsiveness and information processing are modulated by DEX-induced modifications in brain  
89 activity. Finally, DEX drives a shift towards slow-wave oscillation<sup>15 16</sup>, while high-frequencies  
90 power (i.e., beta) can accurately predict responsiveness upon behavioural assessment<sup>17</sup>. These  
91 findings pave the way to investigate the link between responsiveness, depth of sedation, and relative  
92 cortical modulation.

93 Transcranial magnetic stimulation coupled with high-density electroencephalography (TMS-  
94 hdEEG) assesses brain response with a no-task paradigm, bypassing sensory cortices. TMS-hdEEG  
95 is a non-invasive neurostimulation technique that perturbs the brain through a local and fast change  
96 of the magnetic field. This change induces an electrical current that mimics physiological activity,  
97 leading to an endogenous-like response to the pulse. TMS-evoked potential (TEP), the averaged  
98 EEG response to the TMS pulse, captures the neural response.<sup>2 3</sup> TEP at the nearest electrode to the  
99 stimulation side provides information on the local modulation of the TMS. We can operationally  
100 define cortical excitability as the amplitude, slope, and positive/negative response latencies of the  
101 first component (0-30 ms), although we remain blinded to the underlying neuronal events. Cortical  
102 excitability as measured this way is modulated by conscious states<sup>18</sup>, circadian rhythms, sleep, and  
103 sleep deprivation<sup>19 20</sup>. It also increases during unresponsive states such as NREM sleep<sup>21</sup> and  
104 attentional lapses<sup>22</sup>, standing as a promising method to investigate reactivity of the cortex in time  
105 and space as a function of conscious states.

106 In this study, we aimed to directly inquire DEX effects over cortical excitability during different  
107 levels of sedation [namely no sedation (baseline), light sedation, absence of volitional response to  
108 command (deep sedation), and recovery of volitional response (recovery)]. Following the effects  
109 described in sleep, we expected cortical excitability to proportionally increase with depth of  
110 sedation. We hypothesised that cortical excitability would be the highest during deep sedation,

- 111 while there would be virtually no difference between baseline and the recovery condition after DEX
- 112 intake, where subjects show behavioural responsiveness.

## 113 Methods

### 114 Participants

115 *A priori* power analysis and sample size estimation were difficult given the scarcity of research on  
116 TEPs, anaesthesia and cortical excitability. We aimed to include at least 20 subjects, as this is in the  
117 range of most TMS-hdEEG studies.<sup>2 22</sup> Considering drop-out and possible technical problems, we  
118 recruited thirty healthy subjects on the university campus between February 2015 and May 2016.  
119 Participants were screened by a senior anaesthesiologist (VB) to control for the absence of any  
120 contraindications to DEX sedation, TMS, and MRI. We recruited adult healthy volunteers on the  
121 university campus with the following inclusion criteria: more than 18 years, absence of prior  
122 neurological, neurosurgical, or psychiatric history, no history of adverse events during anaesthesia  
123 or previous exposure to dexmedetomidine, no active chronic illness or medication, no contra-  
124 indication to MRI, and no ongoing pregnancy for female participants (efficient contraception or  
125 negative pregnancy test required before inclusion). Five participants were dismissed because  
126 artefact-free TEPs could not be obtained reliably during normal wakefulness, two lost interest in the  
127 study, and two were dropped for technical or logistical reasons. One subject had a minor adverse  
128 reaction to DEX infusion (pruritus without a rash or any other symptoms or signs), for which the  
129 experiment was aborted. Twenty subjects completed the entire experiment (see **Table 1**). All  
130 subjects gave their written informed consent. The study was approved by the Ethics Committee of  
131 the University and University Hospital of Liège, Belgium (number B707201422895, professor V.  
132 Seutin).

### 133 Experimental protocol

134 A visual summary of the protocol can be found in **Figure 1**. After a first screening, eligible  
135 participants underwent an MRI and a TMS-hdEEG pretest during normal wakefulness to find the  
136 most suitable brain target under stimulation of the superior parietal (Precuneus - Brodmann area 7)  
137 and premotor region (Brodmann area 6) at the midline. These brain targets were set for the

138 experimental phase using neuronavigation (Nexstim, Helsinki, Finland). During the experiment,  
139 subjects lied on their back while venous access was installed to infuse the drug. DEX was  
140 administered intravenously using a target-controlled infusion device (TCI, height-adjusted model of  
141 Dyck<sup>23</sup>), providing a constant estimation of DEX plasma concentration. DEX target concentration  
142 was changed by steps of  $0.5 \text{ ng mL}^{-1}$  to achieve the desired behavioural state. Once attained, a 5-  
143 minute equilibration period without any change in target concentration allowed equilibration of  
144 concentrations between pharmacokinetic compartments, and a blood sample was drawn  
145 immediately before and after data acquisition for off-line DEX plasma concentration measurement  
146 via high performance liquid chromatography-mass spectrometry, or HPLC-MS (see Appendix). The  
147 behavioural assessment of depth of sedation was performed at the same times using the University  
148 of Michigan Sedation Scale (UMSS)<sup>24</sup> and Ramsay Scale<sup>25</sup>. There were four conditions for each  
149 subject: “baseline”, before DEX administration; light sedation, marked by drowsiness; deep  
150 sedation, characterised by no behavioural response; recovery, with regaining in response. During  
151 the whole study, physiological parameters were monitored (ECG, peripheral blood oxygen  
152 saturation by pulse oximetry, and end-tidal CO<sub>2</sub> levels). After a baseline TMS-hdEEG recording,  
153 DEX was increased to reach drowsiness. A 5-minute break allows concentration to stabilise,  
154 reaching light sedation, during which subjects were still able to follow a command. The level of  
155 DEX was then incremented by  $0.5 \text{ ng mL}^{-1}$  steps to induce unresponsiveness, alias deep sedation.  
156 For security reason, we did not exceed  $2.5 \text{ ng mL}^{-1}$ . Lastly, the DEX concentration was decreased  
157 by  $0.5 \text{ ng mL}^{-1}$  steps to regain responsiveness to command, which was referred as the recovery  
158 condition. Once responsiveness had returned, the attained concentration was maintained constant  
159 for the duration of recordings.



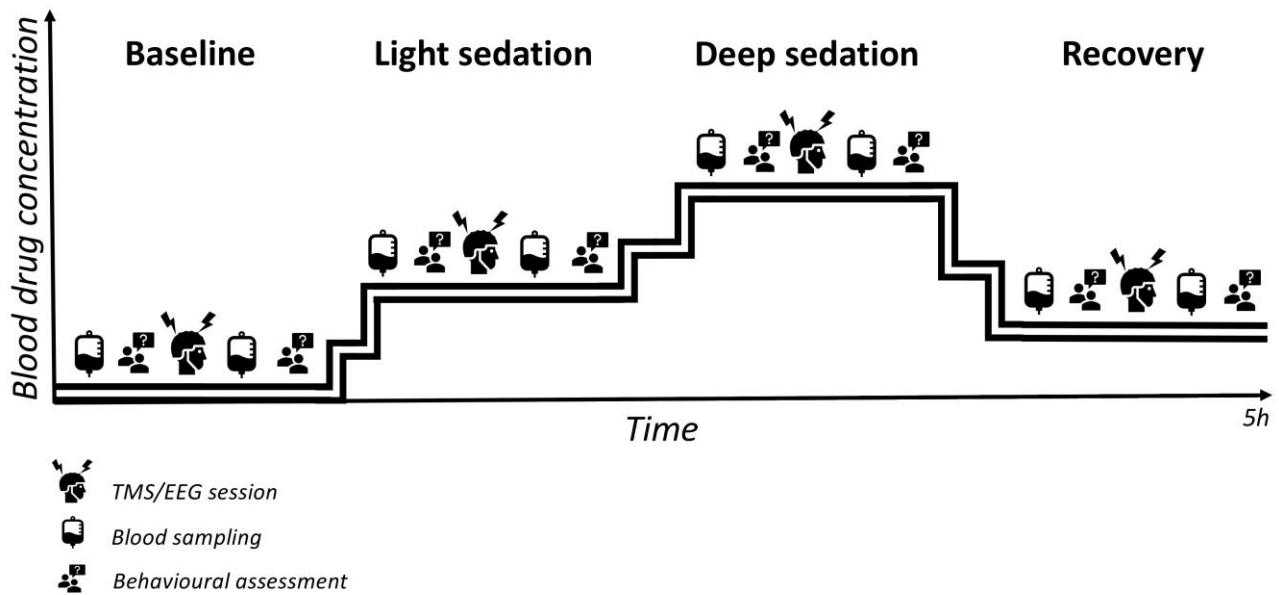

160

161 **Figure 1:** Diagram of the protocol plotted over time (x-axis, arbitrary scale) and DEX concentration (y-axis, arbitrary scale). Four conditions were set (Baseline, Light Sedation, Deep Sedation, Recovery) based on  
162 behavioural assessment. TMS-hdEEG sessions over the parietal and frontal regions were performed in each stable  
163 condition, for a total of 8 sessions per subject.  
164

165

## 166 Data acquisition

### 167 Magnetic resonance imaging

168 High-resolution structural MRI was performed on a 3-Tesla MR scanner (Allegra Prisma, Siemens,  
169 3D isometric 1x1x1mm T1) during wakefulness, on pretesting day, just before the TMS-hdEEG  
170 session. For each participant, diffusion-weighted imaging data was acquired (not used in the study).  
171 T1 was used to perform TMS neuronavigation on the individual cortex.

### 172 TMS-hdEEG

173 A focal bipulse 8-coil (Nexstim, Helsinki, Finland) with a 3D infrared tracking position sensor was  
174 used to perform TMS delivery. Neuronavigation was implemented using glasses head tracker and  
175 the Navigated Brain Stimulation (NBS) system (Nexstim Ltd., Helsinki, Finland) that uses T1-

176 weighted structural MR images to set stimulation target. A 64-channel TMS-compatible EEG  
177 amplifier (Eximia, Helsinki, Finland), equipped with a sample-and-hold circuit to provide TMS-  
178 artefact-free data from 5 ms post-stimulation, was used to record concurrent EEG data during TMS  
179 stimulation. Electro-oculogram (EOG) was recorded with two bipolar electrodes. EEG signal was  
180 band-pass filtered between 0.1 and 500 Hz and sampled at 1450 Hz. Prior to each recording session,  
181 electrodes impedance was set below 5 k $\Omega$ . Stimulation target and intensity were set during the  
182 pretest and were kept constant across all conditions. Left premotor and left parietal cortices were  
183 targeted and the stimulation target was chosen if there was a good TEP with no artefact. The  
184 intensity was adjusted individually to get a good signal-to-noise ratio, with an evoked electric field  
185 intensity at the cortical surface between 100 and 150 Vm<sup>-1</sup>. Each condition had between 200 and  
186 250 trials, with a frequency of 0.5 Hz and a jitter of  $\pm 200$  ms. A thin foam layer under the TMS coil  
187 and white noise mask were used to minimize somatosensory stimulation and auditory evoked  
188 potentials caused by the TMS click, respectively.

## 189 **Behavioural assessment**

190 Behavioural assessment of depth of sedation was performed using the UMSS<sup>24</sup> and Ramsay Scale<sup>25</sup>.  
191 The four conditions had different behavioural profiles: baseline, previous to the DEX  
192 administration, was marked by a clear command-following to the verbal request ‘squeeze my hand’  
193 (Ramsay score 2, UMSS 0); light sedation was marked by drowsiness (Ramsay score 3-4, UMSS 1-  
194 2); deep sedation was characterised by no behavioural response to any verbal command (Ramsay  
195 score 6, UMSS 4); recovery was distinguished by regaining in response after deep sedation  
196 (Ramsay score 3-4, UMSS 1-2). To exclude possible automatic response to command, other minor  
197 attentional and memory tasks were performed. These tasks included predetermined questions about  
198 simple subtractions and autobiographical memory recalls (not analysed here).

199

## 200 **Blood sampling**

201 Before and after each session we took a blood sample to calculate the real plasmatic DEX  
202 concentration. The sample was anonymized and stored at -20°C before being analysed by Orion  
203 Pharma. For more information about the blood sampling and analysis, see Appendix.

204

## 205 **Data analysis**

### 206 **Preprocessing of TMS-hdEEG data**

207 Data were analysed using MATLAB (The Mathworks Inc., Natick, MA). Trial rejection was  
208 performed manually with SSP (SiSyphus Project) to eliminate trials with magnetic artefacts or  
209 ocular/muscular movements. Channels with a high level of noise were rejected. A first 1 Hz high  
210 pass filter was applied to continuous data to eliminate slow oscillating noise. Afterwards data were  
211 downsampled to 1000 Hz, then lowpassed to 80 Hz. Data were subsequently epoched from -100 to  
212 300 ms post-stimulation. A baseline correction between -100 and -1.5 ms was applied. Trials were  
213 then averaged, using robust averaging method, to minimize noise. For more details, see previous  
214 publications where the same methods were applied.<sup>19 20 22</sup>

### 215 **Cortical excitability computation**

216 Cortical excitability was inferred from the amplitude, the slope, the positive and negative latency of  
217 the first component of the TEP, between 0 and 30 ms post-TMS. The TEP was extracted at the  
218 closest electrode to the stimulation point that did not present any artefact (distance of the electrode  
219 from the hotspot, mean  $\pm$  SD,  $39.29 \pm 14$  mm). The latency of the negative peak is the time delay  
220 between the stimulation ( $t_N$ ) and the moment at which the TEP is minimum, and ranges between 9  
221 and 15 ms, while the latency of the positive peak ( $t_P$ ) is the time delay between the stimulation and  
222 the moment at which the TEP is maximum, and ranges between 10 and 30 ms. The amplitude refers  
223 to the peak-to-peak amplitude ( $A_{t_P} - A_{t_N}$ ), which is the microvolt change between peak ( $A_{t_P}$ ) and

224 trough ( $A_{t_N}$ ), while the slope is the maximum change of the first component between  $t_P$  and  $t_N$ .  
225 More details can be found in previous works.<sup>19 20 22</sup> For a visual intuition, see **Figure 2**.

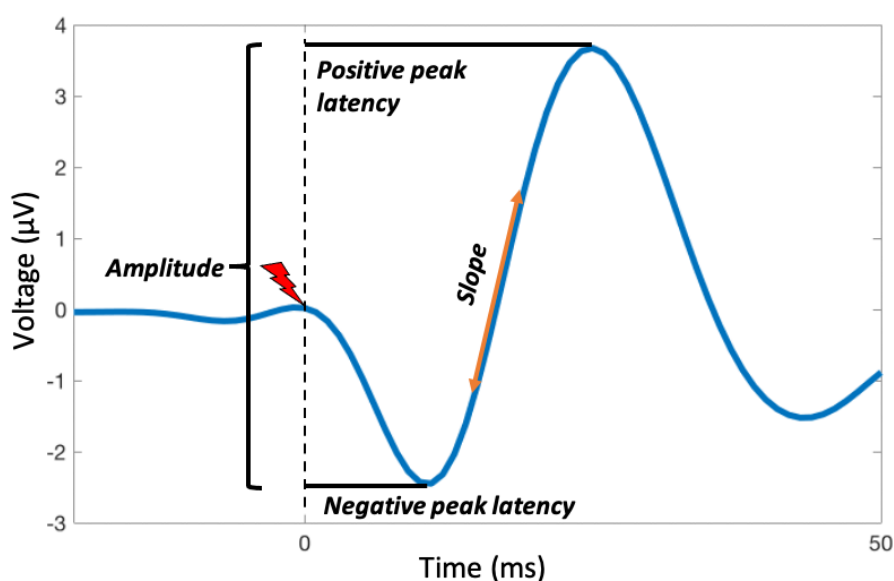

226

227 **Figure 2:** Measures of cortical excitability in the TEP (average TMS-hdEEG responses over trials).

228 The red flash indicates the TMS pulse. We measured the peak-to-peak amplitude of the TEP in  $\mu\text{V}$   
229 (here, around  $6 \mu\text{V}$ ), the latency in milliseconds of the negative peak (here, around 10 ms) and of  
230 the positive peak (here, around 20 ms), and the maximal slope of the curve in voltage over time  
231 ( $\mu\text{V ms}^{-1}$ ). Note that here the slope is represented with the tangent line at the inflection point.

232

## 233 **Statistics**

234 We run four Generalized Linear Mixed Models (GLMMs) on SPSS (IBM® SPSS® Statistics 27), to  
235 test the effect of condition (depth on anaesthesia: baseline, light sedation, deep sedation, and  
236 recovery) and stimulated brain region (frontal and posterior) over cortical excitability (amplitude,  
237 slope, positive, and negative latencies). The model took into consideration the attained DEX  
238 concentration as covariate, and the characteristics of the TMS pulse such as the Mean Induced  
239 Electric Field (V/m) and the distance of the electrode from the stimulation point in millimetres as  
240 random effects. Given that seven participants were still behaviourally responsive in the deep

241 sedation condition (Ramsay score 3-4, UMSS 1-2 instead of the expected scores of 6 and 4,  
242 respectively), responsiveness at any condition was considered in the model as covariate (responsive  
243 vs unresponsive). Pairwise comparisons between conditions were performed with Bonferroni-  
244 adjusted two-tailed t-tests. We considered amplitude as the primary endpoint [ $P_{\text{critical}} = 0.05/(2$   
245 locations x 4 conditions) = 0.006], and slope, positive and negative latencies as secondary endpoints  
246 [ $P_{\text{critical}} = 0.05$ ].

247

## 248 Results

249 We modulated drug concentration to induce different conditions (sedation depth), which lead to  
250 different behavioural responses. The attained concentrations, as measured in the plasma for each  
251 condition were (mean  $\pm$  SD, in ng mL<sup>-1</sup>): baseline:  $0 \pm 0$ ; light sedation:  $1.37 \pm 0.47$ ; deep sedation:  
252  $3.41 \pm 0.778$ ; recovery:  $2.71 \pm 0.47$ . The UMSS score was (median, range): baseline: 0, [0 0]; light  
253 sedation: 2, [1 3]; deep sedation: 4, [2 6]; recovery: 2, [1 4]. Ramsay (median, range): baseline: 2,  
254 [2 2]; light sedation: 3, [3 4]; deep sedation: 6, [3 6]; recovery: 3, [2 5]. Interestingly, 7 out of 20  
255 subjects were still responsive in deep sedation. As said before, we did not want to exceed our  
256 theoretical security threshold of a 2.5 ng mL<sup>-1</sup> theoretical target to ensure the safety of our subjects.  
257 For more information about the participants, see **Table 1** and Appendix (**Table A1**).

258

| Measure       | Statistics        |
|---------------|-------------------|
| Female (Male) | 9 (11)            |
| Age           | $23.85 \pm 2.43$  |
| Height (cm)   | $173.65 \pm 8.42$ |
| Weight (kg)   | $70 \pm 13.71$    |
| BMI           | $23.10 \pm 3.40$  |

|                                                                                           |                                                                                                                                  |
|-------------------------------------------------------------------------------------------|----------------------------------------------------------------------------------------------------------------------------------|
| Distance Electrode                                                                        | Frontal: 31.20 ± 11.21<br>Parietal: 47.40 ± 11.80                                                                                |
| DEX concentration [measured; concentration predicted by the model (ng mL <sup>-1</sup> )] | Baseline: 0 ± 0; 0 ± 0<br>Light: 1.37 ± 0.47; 1.3 ± 0.30<br>Deep: 3.41 ± 0.78; 2.35 ± 0.24<br>Recovery: 2.71 ± 0.47; 1.74 ± 0.31 |

259

260 **Table 1:** Demographics and descriptive statistics of variables. Where continuous variable, we  
261 present mean and standard deviation (mean ± SD); where categorical, we show the count for each.

262

263 According to our hypothesis, we found that condition (depth of sedation) modulated cortical  
264 excitability (see **Figure 3**). As shown in **Table 2**, and according to the GLMM models, there was a  
265 significant interaction between depth of sedation condition and stimulation location for amplitude  
266 [ $F_{(3, 149)} = 4.594$ ,  $P = 0.004$ ] and slope [ $F_{(3, 149)} = 4.009$ ,  $P = 0.009$ ], but not for the negative or  
267 positive peak latencies. Post hoc analysis (**Table 3**) showed that baseline amplitude in the frontal  
268 cortex was significantly different to the one in light sedation (Adjusted  $P < 0.0001$ ), deep sedation  
269 (Adjusted  $P = 0.003$ ) and recovery (Adjusted  $P < 0.001$ ), while the slope in the frontal cortex was  
270 different in all pairwise contrasts (Adjusted  $P < 0.023$ ), except for the deep sedation and recovery  
271 contrast (Adjusted  $P = 0.258$ ). Slope and amplitude had the highest mean value in light sedation.  
272 These differences were not seen in the parietal region. Depth of sedation (**Table 2**) had an effect on  
273 positive peak latency [ $F_{(3, 149)} = 2.807$ ,  $P = 0.042$ ], but not on the latency of the negative peak  
274 [ $F_{(3, 149)} = 0.132$ ,  $P = 0.22$ ]. Irrespective of region, positive peak latency was significantly longer at  
275 light sedation than at baseline (Adjusted  $P = 0.030$ ) (**Table 3**). The stimulated region (frontal vs.  
276 parietal) had an effect on negative peak latency [ $F_{(1, 149)} = 10.498$ ,  $P = 0.001$ ], meaning that it was

277 globally significantly longer in the parietal region than in the frontal one, but no effect over the  
278 positive peak latency [ $F_{(1, 149)} = 1.234$ ,  $P = 0.268$ ]. Responsiveness to command had no effect on  
279 studied parameters (**Table 3**). **Figure 4** shows the effect of conditions and brain regions over  
280 cortical excitability. For more detailed information about the values of cortical excitability, see  
281 Appendix (**Table A2-A3**). We also removed the two subjects who showed the strongest effects ( $z$ -  
282 score > 3) to test robustness of our findings and had virtually the same results with just small  
283 variations (see Appendix).  
284

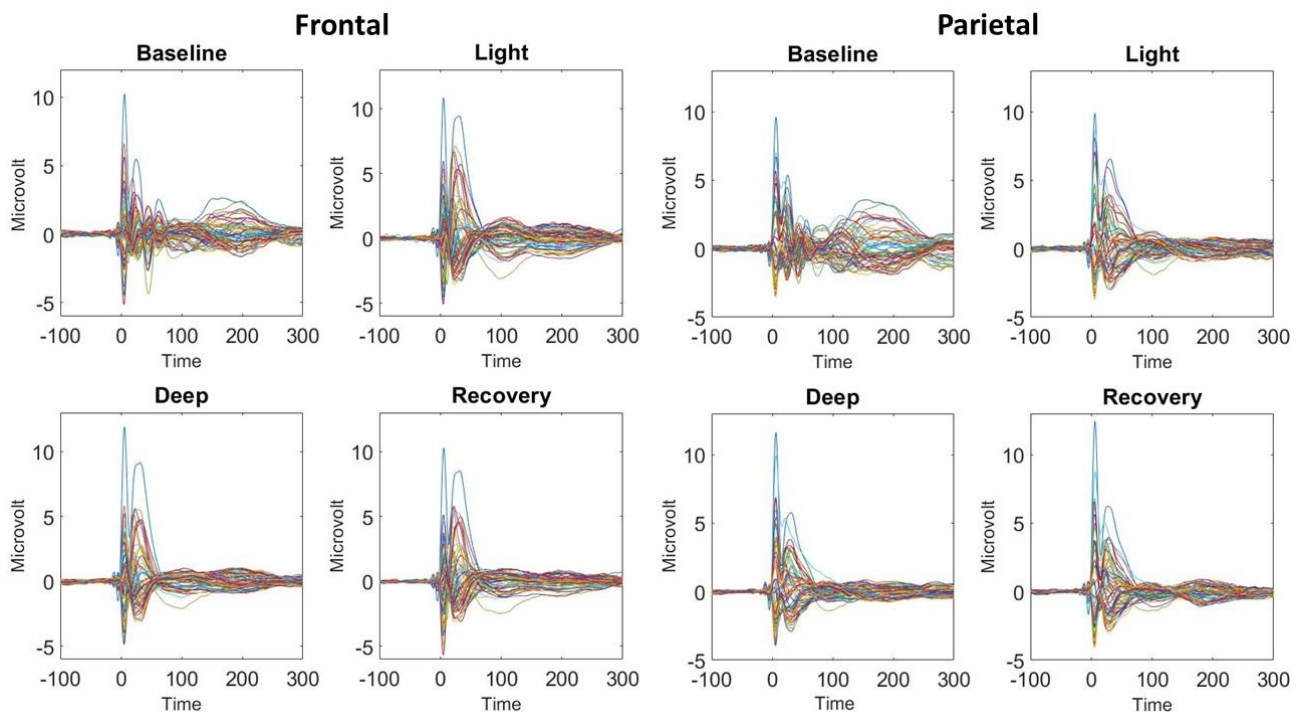

285  
286 **Figure 3:** Grand average of the TMS-Evoked Potentials (TEPs) for all the subjects, divided by  
287 region (Frontal and Parietal) and the depth of sedation (baseline, light sedation, deep sedation,  
288 recovery).

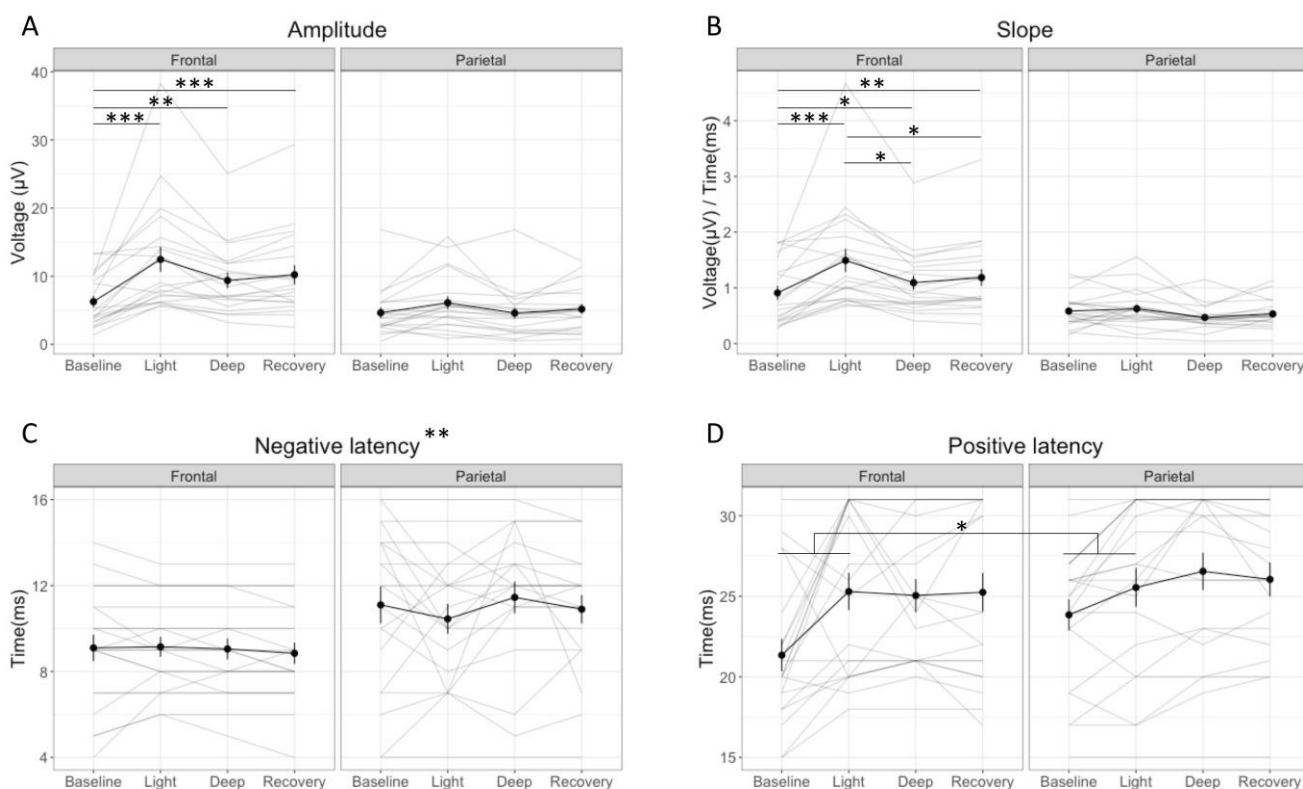

289

290 **Figure 4:** Averaged (black line) and individual results (grey line) of cortical excitability  
 291 measurements (amplitude (A), slope (B), latency of negative peak (C) and latency of positive peak  
 292 (D)) for the four conditions (baseline, light sedation, deep sedation, recovery). Each condition is  
 293 divided according to the region (frontal vs. parietal). Error bars correspond to the standard error of  
 294 the mean (SEM). The biggest change in amplitude and slope appears in the frontal cortex during  
 295 light sedation in comparison to the other three conditions. For the image without the subjects who  
 296 displayed the strongest effect, see Appendix (**Figure A1**). Legend: \* =  $p < 0.05$ , \*\* =  $p < 0.01$ ;  
 297 \*\*\* =  $p < 0.001$

298

| Dependent Variables | Independent variables |           |                               |                   |                           |
|---------------------|-----------------------|-----------|-------------------------------|-------------------|---------------------------|
|                     | Condition*            | Condition | Region (Frontal vs. Parietal) | DEX concentration | Responsiveness to command |
|                     | Region                |           |                               |                   |                           |



|                          |                                                         |                                                            |                                                             |                                            |                                            |
|--------------------------|---------------------------------------------------------|------------------------------------------------------------|-------------------------------------------------------------|--------------------------------------------|--------------------------------------------|
| Amplitude                | <b>F<sub>(3, 149)</sub> = 4.594</b><br><b>P = 0.004</b> | <b>F<sub>(3, 149)</sub> = 9.091</b><br><b>P &lt; 0.001</b> | <b>F<sub>(1, 149)</sub> = 34.566</b><br><b>P &lt; 0.001</b> | F <sub>(1, 149)</sub> = 3.013<br>P = 0.085 | F <sub>(1, 149)</sub> = 0.858<br>P = 0.356 |
| Slope                    | <b>F<sub>(3, 149)</sub> = 4.009</b><br><b>P = 0.009</b> | <b>F<sub>(3, 149)</sub> = 5.66</b><br><b>P = 0.001</b>     | <b>F<sub>(1, 149)</sub> = 50.282</b><br><b>P &lt; 0.001</b> | F <sub>(1, 149)</sub> = 3.352<br>P = 0.069 | F <sub>(1, 149)</sub> = 0.003<br>P = 0.954 |
| Latency of negative peak | F <sub>(3, 149)</sub> = 0.231<br>P = 0.875              | F <sub>(3, 149)</sub> = 0.132<br>P = 0.941                 | <b>F<sub>(1, 149)</sub> = 10.498</b><br><b>P = 0.001</b>    | F <sub>(1, 149)</sub> = 0.830<br>P = 0.364 | F <sub>(1, 149)</sub> = 0.069<br>P = 0.793 |
| Latency of positive peak | F <sub>(3, 149)</sub> = 2.154<br>P = 0.96               | <b>F<sub>(3, 149)</sub> = 2.807</b><br><b>P = 0.042</b>    | F <sub>(1, 149)</sub> = 1.234<br>P = 0.268                  | F <sub>(1, 149)</sub> = 1.105<br>P = 0.295 | F <sub>(1, 149)</sub> = 0.002<br>P = 0.964 |

299

300 **Table 2.** Results of the Generalized Linear Mixed Model (GLMM) on the modulation of cortical  
 301 excitability. We took into consideration the condition (baseline, light sedation, deep sedation and  
 302 recovery), the stimulated region (frontal vs. parietal), their interaction, the DEX concentration in the  
 303 blood, and whether subjects were responsive in deep sedation. Significant effects in **bold**. Mean  
 304 values and standard deviation of each measurement for condition are reported in the Appendix  
 305 (**Table A2**).

306

| Pairwise comparisons in the frontal region for amplitude and slope |                            |                                 |                  |                         |               |
|--------------------------------------------------------------------|----------------------------|---------------------------------|------------------|-------------------------|---------------|
| Measure                                                            | Contrast                   | Estimate of the mean difference | Adjusted P       | 95% Confidence interval |               |
|                                                                    |                            |                                 |                  | Inferior                | Superior      |
| Amplitude                                                          | <b>Baseline – Light</b>    | <b>-6.519</b>                   | <b>&lt;0.001</b> | <b>-9.852</b>           | <b>-3.186</b> |
|                                                                    | <b>Baseline – Deep</b>     | <b>-4.553</b>                   | <b>0.003</b>     | <b>-7.877</b>           | <b>-1.230</b> |
|                                                                    | <b>Baseline – Recovery</b> | <b>-5.027</b>                   | <b>&lt;0.001</b> | <b>-8.192</b>           | <b>-1.863</b> |
|                                                                    | Light – Deep               | 1.966                           | 0.084            | -0.180                  | 4.111         |
|                                                                    | Light – Recovery           | 1.492                           | 0.130            | -0.326                  | 3.309         |
|                                                                    | Deep - Recovery            | -0.474                          | 0.230            | -1.252                  | 0.304         |
| Slope                                                              | <b>Baseline – Light</b>    | <b>-0.605</b>                   | <b>&lt;0.001</b> | <b>-0.958</b>           | <b>-0.251</b> |
|                                                                    | <b>Baseline – Deep</b>     | <b>-0.334</b>                   | <b>0.022</b>     | <b>-0.631</b>           | <b>-0.036</b> |
|                                                                    | <b>Baseline – Recovery</b> | <b>-0.370</b>                   | <b>0.007</b>     | <b>-0.668</b>           | <b>-0.072</b> |
|                                                                    | <b>Light – Deep</b>        | <b>0.271</b>                    | <b>0.020</b>     | <b>0.031</b>            | <b>0.511</b>  |
|                                                                    | <b>Light – Recovery</b>    | <b>0.235</b>                    | <b>0.022</b>     | <b>0.026</b>            | <b>0.443</b>  |
|                                                                    | Deep - Recovery            | -0.036                          | 0.258            | -0.100                  | 0.027         |
| Contrasts of positive latency                                      |                            |                                 |                  |                         |               |
| Contrast                                                           |                            | Estimate of                     | Adjusted P       | 95% Confidence interval |               |

|                     | the mean difference |              | Inferior      | Superior      |
|---------------------|---------------------|--------------|---------------|---------------|
| Baseline – Light    | <b>-2.278</b>       | <b>0.030</b> | <b>-4.419</b> | <b>-0.138</b> |
| Baseline – Deep     | -2.025              | 0.350        | -5.001        | 0.951         |
| Baseline – Recovery | -2.059              | 0.230        | -4.730        | 0.612         |
| Light - Deep        | 0.253               | 1.000        | -1.332        | 1.839         |
| Light - Recovery    | 0.219               | 1.000        | -1.262        | 1.700         |
| Deep - Recovery     | -0.035              | 1.000        | -0.903        | 0.833         |

307

308 **Table 3** Post-hoc comparison for amplitude and slope in the frontal cortex, and for positive latency  
 309 over the depth of sedation conditions. Significant comparisons are represented in **bold**. Since  
 310 amplitude is our main endpoint, its  $P_{\text{critical}}$  is set to 0.006, while for slope and positive latency  $P_{\text{critical}}$   
 311 is 0.05.

312

313 Covariates as mean induced electric field, which summarize TMS pulse characteristics, and the  
 314 distance of the electrode from which the TEP was taken, had a significant effect over cortical  
 315 excitability. These effects are negligible and not informative for our purpose, as they were constant  
 316 across conditions and had a smaller effect size compared to the effects of condition or brain region.  
 317 They are reported in the Appendix (**Table A4**).

318

## 319 Discussion

320 In the current study, we measured changes in cortical excitability as a function of the depth of DEX  
321 sedation in 20 healthy subjects, taking into consideration four conditions (baseline, light sedation,  
322 deep sedation, and recovery). Cortical excitability at the sensor level has been reported to increase  
323 during unconscious states, such as deep NREM sleep or disorder of consciousness like the  
324 unresponsive wakefulness syndrome.<sup>21 26</sup> Thus, we expected cortical excitability to increase  
325 proportionally with the depth of sedation, being maximum during the deep sedation. According to  
326 our hypothesis, the condition had a strong effect on amplitude and slope. Interestingly, the effect  
327 was only present in the frontal cortex, and in contrast to our expectations, was not higher in the  
328 deep sedation compared to the light sedation, when subjects were drowsy but still able to respond to  
329 a command. To our knowledge, this is the first time that a non-linear evolution of cortical  
330 excitability is described under the action of an anaesthetic agent, in a region-specific manner. It is  
331 important to remark here that our definition of cortical excitability is purely operational in this  
332 context, in that it refers to the amplitude/slope of early TEPs, rather than to the nature of the  
333 underlying neuronal events. In fact, various mechanisms may account for the enhancement of early  
334 TEPs in DEX, including a stronger driving force in hyperpolarized postsynaptic neurons<sup>27</sup>, an  
335 increased discharge synchrony of cortical populations<sup>28</sup>, a reduction in synaptic depression<sup>29 30</sup>, and  
336 thalamic bursting triggered by the TMS-induced corticothalamic volley.

337

338 The increase of cortical excitability recorded in the frontal cortex is in line with two recent works  
339 about spontaneous conscious transition and TEPs.<sup>22 31</sup> In the first one, cortical excitability of the  
340 motor cortex increased during drowsiness, but did not change in unresponsiveness, when  
341 participants were allowed to drift towards sleep during a detection task.<sup>31</sup> In the second one, cortical  
342 excitability in the premotor cortex transiently increases during lapses of attention in a continuous  
343 attentive task after the usual bedtime, compared to no-lapses periods.<sup>22</sup> These evidences support the

344 idea that the reactivity of the frontal cortex is specifically altered in drowsy conditions where  
345 subjects might have impaired (but evident) behavioural responsiveness, as the one here described  
346 during light sedation. In congruence with this view, we observed higher amplitude in recovery (that  
347 is, after regaining response to command) compared to baseline. Arguably, during recovery,  
348 participants were in a state that was closer to light sedation than to baseline, being still drowsy. In  
349 other words, our results extend with a chemical manipulation what was previously reported in  
350 natural settings. It is however possible that these effects are specific to the sleep-like modulation of  
351 DEX and might not extend to other anaesthetics that are not  $\alpha_2$ -adrenergic agonists. If it is an effect  
352 of the sedation *per se*, cortical excitability might be a novel index of drowsiness and sedation,  
353 whose neural mechanisms should be investigated. However, the absence of the effect in the parietal  
354 cortex is a peculiar observation, as there are several reports that highlight the role of parietal regions  
355 for the emergence of consciousness.<sup>32</sup> Future research should address this phenomenon in more  
356 detail.

357

358 Drug modulations of TMS-evoked responses are of paramount importance to depict the underlying  
359 neural dynamics of the compound, and to bridge neurochemical pathways, brain mechanisms, and  
360 behaviour. If there are a number of studies that inferred cortical excitability with TMS looking at  
361 changes in the resting state motor thresholds<sup>33 34</sup>, just a few observed TEPs.<sup>31 35</sup> One issue is that  
362 TEPs (and in general evoked-responses) change from region to region,<sup>36-38</sup> as proven by the effect  
363 of the region over the negative latency (see **Figure 4**). This is relevant, as TEPs might be modulated  
364 not only by the depth of sedation *per se*, but by the changes of the oscillatory activity (in a power-<sup>38</sup>  
365 or a phase-dependent<sup>39</sup> manner). In fact, the depth of sedation causes spectral modification, in  
366 particular within the beta frequency band, which predicts responsiveness under anaesthesia<sup>17</sup> and  
367 wakefulness<sup>40</sup>, and the alpha and delta band, which are modulated by DEX concentration and state  
368 of consciousness.<sup>16</sup> As shown in a recent work, alpha and beta activity in Rhesus macaques after  
369 DEX anaesthesia differs between loss of consciousness, recovery of consciousness, and the

370 recovery of the task performance at pre-anaesthesia level.<sup>41</sup> Future investigations should pinpoint in  
371 finer details what is the relationship between responsiveness, natural oscillation, and TEPs.

372

373 The current study presents strong effects on cortical excitability, with the same trend present in  
374 almost all the subjects we recorded. However, there are still some relevant limitations. First, we  
375 used a behavioural assessment for inferring consciousness. The absence of behavioural responses  
376 does not always coincide with unconsciousness<sup>42</sup> and subjects may have relatively preserved higher  
377 order cognitive processes (i.e., semantics) during the loss of responsiveness due to DEX.<sup>14</sup> In other  
378 words, one could say that consciousness assessment should be refined with bedside  
379 neurophysiological measurements. Nevertheless, we are confident that our participants were in a  
380 deep sedation even if some were responsive, considered that the DEX concentration in the blood  
381 was very high. Still, the reason why some subjects were still responsive in deep sedation while  
382 others were not is not clear. This may have something to do with the accuracy of the model we used  
383 for target-controlled infusion, and/or to inter-individual variability in the sensitivity to DEX action.  
384 The mechanisms that lead to responsiveness to a certain drug should be approached in a systematic  
385 way. Given that brain dynamics<sup>43</sup> and spectral power<sup>16</sup> change after DEX administration in dose-  
386 dependent fashion, different patterns and biomarkers could be used to predict responsiveness. Here,  
387 as shown in **Table 1**, responsiveness in deep sedation had no effect over cortical excitability ( $P >$   
388  $0.35$ ), so probably it cannot be used to predict responsiveness as it is. Another possible problem is  
389 that we did not randomize the order of light and deep sedation. We cannot exclude that the high  
390 excitability of light sedation is driven just by an order effect. Other studies with randomization  
391 could ensure that this not the case. Additionally, we did not have any free recall after the sessions.  
392 This could have helped to understand the phenomenological status of subjects, even when they did  
393 not show any kind of response to verbal command. Finally, as previously mentioned, a comparison  
394 with other drugs might show the extent of our results and elucidate possible underlying dynamics.

395 This is relevant to comprehend which neuropathways are important in changing cortical excitability  
396 and what is its links to sedation in a drug (in)dependent-manner.

397

398 In conclusion, we provide here the first evidence of non-linear evolution of cortical excitability after  
399 DEX intake, as indexed by the first component (0-30 ms) of the TEP at the closest electrode to the  
400 stimulation hotspot. We demonstrated that DEX sedation increases local cortical excitability in a  
401 region-specific manner, but do not differs between sedation level. In particular, we had no  
402 difference in cortical excitability between light sedation, deep sedation and recovery. This is in line  
403 with recent findings that describe abnormal high cortical excitability during drowsiness in natural  
404 settings. Interestingly, the effect was present only in the frontal cortex, and not in the parietal one.  
405 These results foster new questions for possible investigations about the nature of sedation and  
406 drowsiness that will result in a deeper understanding of cortical dynamics during anaesthesia.

## 407 Authors' contribution

408 OB, VB, SL and RS designed the study. OB, SW, MK, JS, AV, and VB collected the data. PC  
409 analysed the data. Data interpretation was performed by all authors. PC drafted the article with the  
410 help of OG and VB. All authors revised it critically for important intellectual content and gave final  
411 approval of the revised manuscript.

## 412 Declaration of interests

413 VB declares that he has received a research grant from Orion Pharma and honoraria for consultancy  
414 from Medtronic for the past 6 years. PC, OB, MK, JS, AV, CM, JS, SW, RS, SL, MM & OG  
415 declare that they have no conflict of interest.

## 416 Funding

417 The study was supported by Orion Pharma [unrestricted grant and measurement of plasma  
418 dexmedetomidine concentrations, Orion Corporation (Business Identity Code FI 19992126),  
419 Orionintie 1, PO Box 65, 02200 Espoo, Finland], the University and University Hospital of Liège,  
420 the Belgian National Funds for Scientific Research (F.R.S-FNRS), the European Union's Horizon  
421 2020 Framework Program for Research and Innovation under the Specific Grant Agreement No.  
422 945539 (Human Brain Project SGA3), the BIAL Foundation, AstraZeneca Foundation, the Generet  
423 funds and the King Baudouin foundation, the James McDonnell Foundation, Mind Science  
424 Foundation, Mind Care Foundation, IAP research network P7/06 of the Belgian Government  
425 (Belgian Science Policy), the Public Utility Foundation 'Université Européenne du Travail', the  
426 "Fondazione Europea di Ricerca Biomedica", the Erasmus+ Traineeship, the CUPPD (University of  
427 Liège) and the GIGA Doctoral School for Healthy Sciences (University of Liège). O.G. is research  
428 associate and S.L. is research director at the F.R.S-FNRS.

## 429 Acknowledgements

430 We thank all the volunteers who participated in our studies, Gilles Vandewalle for vital support in  
431 the implementation of TMS-hdEEG excitability computation, Mario Rosanova, Simone Sarasso,  
432 Matteo Fecchio, and Renzo Comolatti for valuable discussions on DEX effects and TMS-hdEEG  
433 interpretation. We finally thank Orion Pharma for the quantification of DEX concentration in the  
434 blood.



## 435 Appendix

### 436 **Methods – Blood sampling and dexmedetomidine quantification**

437 Sample preparation was performed using solid phase extraction (SPE). Aliquots of 250 µl of plasma  
438 were mixed with 675 µl of 0.1% formic acid in water and 75 µl of internal standard solution  
439 (medetomidine-d<sub>3</sub>, 1 ng/ml). Samples were then extracted with Sep-Pak® tC18 100 mg 96-Well  
440 Plates (Waters Corporation, Milford, MA, USA) using an Oasis 96-well plate extraction manifold  
441 (Waters). The evaporation residue was dissolved in 100 µl of a solution containing 30 % methanol  
442 and 70 % water.

443 The HPLC-MS/MS system consisted of an Agilent 1200 HPLC instrument (Agilent, Santa Clara,  
444 California, USA) and an AB Sciex QTrap4000 triple quadrupole mass spectrometer (AB Sciex  
445 LLC, Concord, ON, Canada). Separations were performed with Gemini C<sub>18</sub> analytical column (150  
446 x 2.0 mm, particle size 5 µm; Phenomenex, Torrance, CA, USA)) coupled with Gemini C<sub>18</sub>  
447 precolumn (Phenomenex). The column oven temperature was + 28°C. The mobile phase consisted  
448 of two eluents: A was 0.1 % formic acid in water and B was 0.1 % formic acid in methanol. The  
449 HPLC gradient began and was held for 1 min at 10 % of B and was then ramped to reach 95 % at 7  
450 min. Then B was decreased back to 10 % in 0.5 min and held there for 3.5 min. The run time was  
451 11 min with a flow rate of 0.3 ml/min. Sample injection volume was 20 µl. The retention time of  
452 dexmedetomidine and medetomidine-d<sub>3</sub> was approximately 5.5 min.

453 Mass spectrometric detection was carried out using positive Turbo Ion Spray (TIS) ionisation and  
454 multiple reaction monitoring (MRM) mode. The ion source temperature was +500°C. The nebulizer  
455 gas (Gas 1) and turbo gas (Gas 2) settings were 50. Curtain gas (nitrogen) was set to 16. The TIS  
456 voltage setting was 5000 V. The selected reactions were as follows: for dexmedetomidine, the  
457 precursor ion – fragment ion pair was m/z 201.2 - m/z 95.05, and for the deuterated internal  
458 standard it was m/z 204.2 – m/z 98.05. The dwell time was 300 ms for both ion transitions. The

459 declustering potential was 55 V for both molecules. Entrance potential was 10 V. Collision energy  
460 was 22 V. Collision cell exit potentials were 7 V and 6 V.

461 The calculations for the quantification were based on peak area ratios of the analyse and the internal  
462 standard. The chromatograms were analysed and processed using AB Sciex software (Analyst®  
463 version 1.6.3). The standard curves were generated using linear regression with  $1/x^2$  weighting.

464

## 465 **Methods – Descriptive statistics**

| Subject | Age | Sex    | Height (cm) | Weight (kg) | BMI   | Handedness | Responsive in deep sedation |
|---------|-----|--------|-------------|-------------|-------|------------|-----------------------------|
| 1       | 21  | Male   | 184         | 95          | 28.06 | Right      | False                       |
| 2       | 22  | Female | 163         | 64          | 24.09 | Right      | True                        |
| 3       | 26  | Male   | 185         | 66          | 19.28 | Right      | False                       |
| 4       | 24  | Male   | 179         | 66          | 20.60 | Right      | False                       |
| 5       | 25  | Female | 164         | 62          | 23.05 | Right      | False                       |
| 6       | 23  | Female | 159         | 58          | 22.94 | Right      | False                       |
| 7       | 23  | Male   | 182         | 81          | 24.45 | Right      | False                       |
| 8       | 28  | Female | 170         | 68          | 23.53 | Right      | True                        |
| 9       | 24  | Male   | 180         | 98          | 30.25 | Right      | True                        |

|           |    |        |     |    |       |       |       |
|-----------|----|--------|-----|----|-------|-------|-------|
| <b>10</b> | 27 | Male   | 179 | 77 | 24.03 | Right | False |
| <b>11</b> | 24 | Male   | 178 | 63 | 19.88 | Right | False |
| <b>12</b> | 24 | Female | 172 | 63 | 21.30 | Right | True  |
| <b>13</b> | 22 | Female | 169 | 55 | 19.26 | Right | False |
| <b>14</b> | 19 | Male   | 183 | 63 | 18.81 | Right | False |
| <b>15</b> | 24 | Female | 177 | 90 | 28.73 | Left  | True  |
| <b>16</b> | 26 | Male   | 169 | 55 | 19.26 | Left  | False |
| <b>17</b> | 19 | Female | 162 | 53 | 20.20 | Right | False |
| <b>18</b> | 24 | Male   | 180 | 79 | 24.38 | Left  | True  |
| <b>19</b> | 27 | Male   | 177 | 85 | 27.13 | Left  | True  |
| <b>20</b> | 25 | Female | 161 | 59 | 22.76 | Right | False |

466 **Table A1:** Demographics of participants, with age, weight, handedness and whether they were still  
 467 responsive to verbal command with high doses of DEX.

468

| Measurements | Region  | Descriptive statistics |                |               |              |
|--------------|---------|------------------------|----------------|---------------|--------------|
|              |         | Baseline               | Light sedation | Deep sedation | Recovery     |
| Amplitude    | Frontal | 6.27 ± 3.29            | 12.46 ± 6.37   | 9.37 ± 3.36   | 10.22 ± 4.68 |

|                  |          |              |              |              |              |
|------------------|----------|--------------|--------------|--------------|--------------|
|                  | Parietal | 4.64 ± 4.12  | 6.10 ± 4.14  | 4.61 ± 3.84  | 5.18 ± 3.36  |
| Slope            | Frontal  | 0.91 ± 0.39  | 1.49 ± 0.69  | 1.09 ± 0.32  | 1.18 ± 0.42  |
|                  | Parietal | 0.58 ± 0.43  | 0.62 ± 0.42  | 0.47 ± 0.38  | 0.53 ± 0.35  |
| Negative Latency | Frontal  | 9.10 ± 2.17  | 9.15 ± 1.69  | 9.05 ± 1.81  | 8.85 ± 1.90  |
|                  | Parietal | 11.10 ± 2.91 | 10.45 ± 2.21 | 11.45 ± 2.85 | 10.90 ± 2.24 |
| Positive Latency | Frontal  | 21.35 ± 5.09 | 25.30 ± 4.33 | 25.05 ± 3.78 | 25.25 ± 4.58 |
|                  | Parietal | 23.85 ± 3.51 | 25.55 ± 4.26 | 26.55 ± 4.20 | 26.05 ± 3.55 |

469 **Table A2:** Mean and standard deviation (mean ± SD) of cortical excitability measurement for each  
 470 condition (baseline, light sedation, deep sedation, recovery), divided for region (frontal and  
 471 parietal).

472

| Subject | Region   | Electrode Distance (mm) | Induced EF (V/m) |
|---------|----------|-------------------------|------------------|
| 1       | Frontal  | 27.73                   | 136.29           |
|         | Parietal | 54.64                   | 118.08           |
| 2       | Frontal  | 31.40                   | 113.52           |
|         | Parietal | 42.94                   | 147.47           |
| 3       | Frontal  | 16.40                   | 135.08           |
|         | Parietal | 54.97                   | 143.18           |
| 4       | Frontal  | 35.23                   | 105.54           |
|         | Parietal | 47.42                   | 134.18           |
| 5       | Frontal  | 25.48                   | 118.69           |
|         | Parietal | 50.57                   | 146.72           |
| 6       | Frontal  | 31.11                   | 119.22           |
|         | Parietal | 31.06                   | 132.39           |
| 7       | Frontal  | 38.39                   | 121.29           |
|         | Parietal | 37.66                   | 134.15           |

|    |          |       |        |
|----|----------|-------|--------|
| 8  | Frontal  | 44.10 | 118.32 |
|    | Parietal | 38.54 | 104.93 |
| 9  | Frontal  | 33.90 | 130.57 |
|    | Parietal | 54.97 | 139.21 |
| 10 | Frontal  | 36.69 | 110.97 |
|    | Parietal | 65.40 | 98.95  |
| 11 | Frontal  | 20.06 | 144.04 |
|    | Parietal | 57.84 | 164.70 |
| 12 | Frontal  | 23.32 | 125.36 |
|    | Parietal | 52.70 | 145.11 |
| 13 | Frontal  | 28.04 | 133.41 |
|    | Parietal | 63.73 | 139.82 |
| 14 | Frontal  | 58.86 | 125.15 |
|    | Parietal | 51.62 | 130.96 |
| 15 | Frontal  | 54.18 | 117.35 |
|    | Parietal | 45.06 | 136.24 |
| 16 | Frontal  | 16.06 | 130.50 |
|    | Parietal | 58.15 | 119.71 |
| 17 | Frontal  | 23.77 | 106.38 |
|    | Parietal | 26.41 | 139.41 |
| 18 | Frontal  | 27.68 | 125.81 |
|    | Parietal | 27.30 | 138.20 |
| 19 | Frontal  | 26.12 | 128.86 |
|    | Parietal | 31.97 | 131.52 |
| 20 | Frontal  | 25.06 | 120.28 |
|    | Parietal | 55.15 | 144.03 |

473 **Table A3:** Distance of the electrode (mm) from the stimulation hotspot and induced electrical field  
 474 (V/m)

475 **Results – Additional results of GLMM**

| Dependent Variables       | Independent variable                                              |                                                                |
|---------------------------|-------------------------------------------------------------------|----------------------------------------------------------------|
|                           | Electric field (V/m)                                              | Electrode Distance (mm)                                        |
| Amplitude                 | $Z = 2.598$<br>$P = 0.009$                                        | $Z = 1.357$<br>$P = 0.175$                                     |
| Slope                     | <b><math>Z = 4.048</math></b><br><b><math>P &lt; 0.001</math></b> | <b><math>Z = 1.988</math></b><br><b><math>P = 0.047</math></b> |
| Latency of negative peak* | $Z = /$<br>$P = /$                                                | $Z = 1.388$<br>$P = 0.165$                                     |
| Latency of positive peak  | $Z = 0.602$<br>$P = 0.547$                                        | $Z = 0.864$<br>$P = 0.387$                                     |

476 **Table A4:** Results of induced electric field caused by the TMS, and the distance of the electrode  
477 from the hotspot, for the four measures of cortical excitability. In **bold**, significant results, and in  
478 *italics* tendencies. Note that the induced electric field is not significant for amplitude ( $P = 0.009$ ) as  
479 it is the primary endpoint and we have corrected for multiple comparison ( $P_{\text{critical}} = 0.006$ ). SPSS  
480 reported that induced electric field was redundant for the negative peak and gave no results for it.

481

482 **Results – GLMM without subjects with strong effect**

483 To control the robustness of our results, we rerun the analysis excluding the subjects who showed  
484 the strongest results. As visible in **Figure 4**, two subjects presented relatively high amplitude  
485 (normalized amplitude  $> 3$  standard deviations). The results without these two participants are  
486 virtually identical to the presented in the main text, showing a strong effect of condition over  
487 amplitude and slope, in particular in the frontal cortex. In **Figure A1**, we show the individual and  
488 average results by condition and cortical excitability parameters for all participants, while **Table A5**  
489 displays the significance of the results.

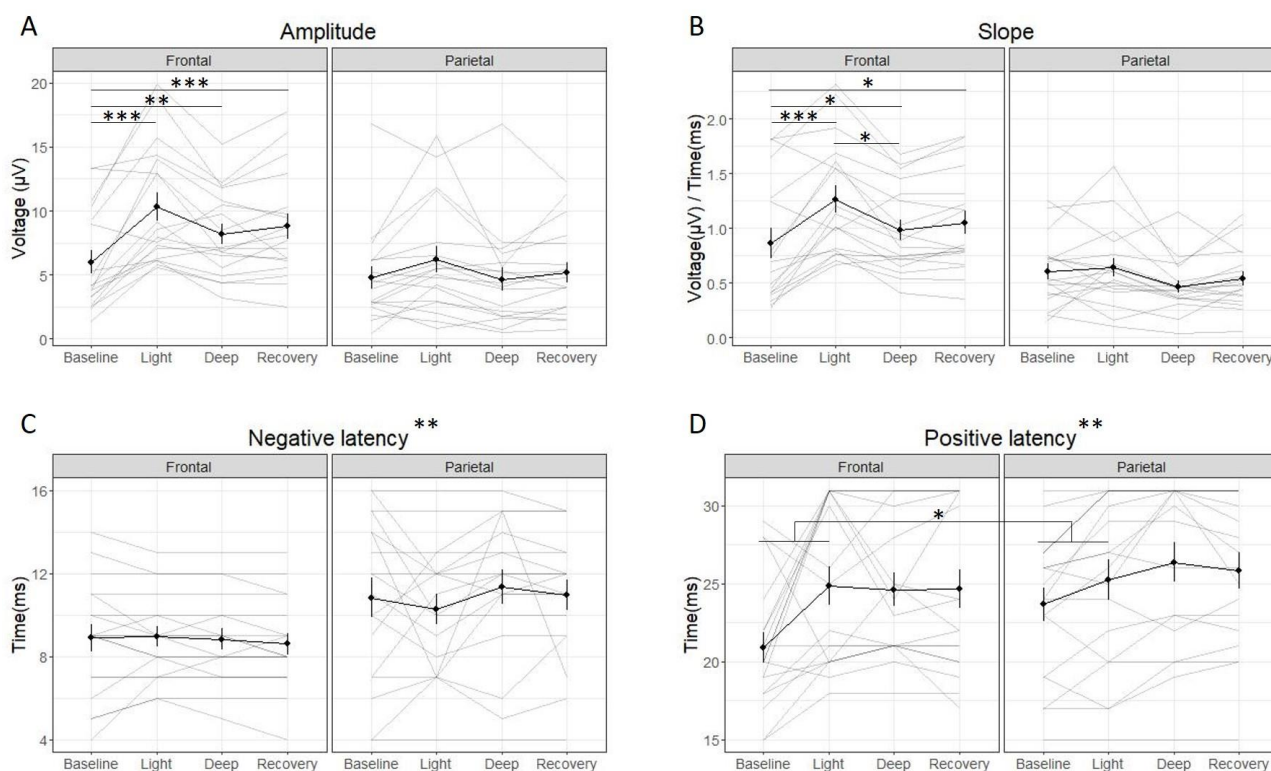

490  
 491 **Figure A1:** Averaged (black line) and individual results (grey line) of cortical excitability  
 492 measurements (amplitude (A), slope (B), latency of negative peak (C) and latency of positive peak  
 493 (D)) for the four conditions (baseline, light sedation, deep sedation, recovery). As **Figure 4**, divided  
 494 in region (frontal vs. parietal), and with the standard error of the mean (SEM). The biggest change  
 495 in the amplitude and slope appears in the frontal cortex during light sedation in comparison to the  
 496 other three conditions. Legend: \* =  $p < 0.05$ , \*\* =  $p < 0.01$ ; \*\*\* =  $p < 0.001$   
 497

| Dependent Variables | Independent variables                 |                                        |                                       |                                       |                                       |
|---------------------|---------------------------------------|----------------------------------------|---------------------------------------|---------------------------------------|---------------------------------------|
|                     | Condition                             | Region (Frontal vs Parietal)           | Condition* Region                     | DEX concentration                     | Responsiveness in deep sedation       |
| Amplitude           | $F_{(3, 133)} = 5.319$<br>$P < 0.001$ | $F_{(1, 133)} = 9.352$<br>$P = 0.003$  | $F_{(3, 133)} = 3.513$<br>$P = 0.017$ | $F_{(1, 133)} = 3.709$<br>$P = 0.056$ | $F_{(1, 133)} = 1.817$<br>$P = 0.180$ |
| Slope               | $F_{(3, 133)} = 6.552$<br>$P < 0.001$ | $F_{(1, 133)} = 18.948$<br>$P < 0.001$ | $F_{(3, 133)} = 3.716$<br>$P = 0.013$ | $F_{(1, 133)} = 4.460$<br>$P = 0.037$ | $F_{(1, 133)} = 0.052$<br>$P = 0.819$ |

|                          |                                                              |                                                               |                                     |                                     |                                     |
|--------------------------|--------------------------------------------------------------|---------------------------------------------------------------|-------------------------------------|-------------------------------------|-------------------------------------|
| Latency of negative peak | $F_{(3, 133)} = 0.171$<br>P = 0.916                          | <b><math>F_{(1, 133)} = 10.555</math></b><br><b>P = 0.001</b> | $F_{(3, 133)} = 0.329$<br>P = 0.804 | $F_{(1, 133)} = 0.952$<br>P = 0.331 | $F_{(1, 133)} = 0.056$<br>P = 0.813 |
| Latency of positive peak | <b><math>F_{(3, 133)} = 2.725</math></b><br><b>P = 0.047</b> | <b><math>F_{(1, 133)} = 9.887</math></b><br><b>P = 0.002</b>  | $F_{(3, 133)} = 1.431$<br>P = 0.237 | $F_{(1, 133)} = 1.329$<br>P = 0.251 | $F_{(1, 133)} = 0.651$<br>P = 0.421 |

498

499 **Table A5.** Results of the Generalized Linear Mixed Model (GLMM) on the modulation of cortical  
500 excitability, without the subjects who had the strongest effect. Significant factors are in **bold**. For  
501 contrast and estimate of the contrasts of amplitude and slope in the frontal region, see **Table A6**.

502

503

| Pairwise comparisons in the frontal region |                            |               |                   |                         |               |
|--------------------------------------------|----------------------------|---------------|-------------------|-------------------------|---------------|
| Measure                                    | Contrast                   | Estimate      | Adjusted P        | 95% Confidence interval |               |
|                                            |                            |               |                   | Inferior                | Superior      |
| Amplitude                                  | <b>Baseline – Light</b>    | <b>-4.891</b> | <b>&lt;0.0001</b> | <b>-7.338</b>           | <b>-2.444</b> |
|                                            | <b>Baseline – Deep</b>     | <b>-3.469</b> | <b>0.003</b>      | <b>-6.043</b>           | <b>-0.896</b> |
|                                            | <b>Baseline – Recovery</b> | <b>-3.938</b> | <b>&lt;0.001</b>  | <b>-6.479</b>           | <b>-1.398</b> |
|                                            | Light – Deep               | 1.422         | 0.144             | -0.306                  | 3.149         |
|                                            | Light – Recovery           | 0.953         | 0.360             | -0.649                  | 2.555         |
|                                            | Deep - Recovery            | -0.469        | 0.360             | -1.346                  | 0.409         |
| Slope                                      | <b>Baseline – Light</b>    | <b>-0.457</b> | <b>&lt;0.0001</b> | <b>-0.726</b>           | <b>-0.188</b> |
|                                            | <b>Baseline – Deep</b>     | <b>-0.269</b> | <b>0.042</b>      | <b>-0.531</b>           | <b>-0.007</b> |
|                                            | <b>Baseline – Recovery</b> | <b>-0.308</b> | <b>0.013</b>      | <b>-0.571</b>           | <b>-0.045</b> |
|                                            | <b>Light – Deep</b>        | <b>0.188</b>  | <b>0.042</b>      | <b>0.004</b>            | <b>0.372</b>  |
|                                            | Light – Recovery           | 0.149         | 0.070             | -0.009                  | 0.308         |
|                                            | Deep - Recovery            | -0.039        | 0.257             | -0.106                  | 0.029         |

504

505 **Table A6:** Post-hoc comparison for the amplitude and slope in the frontal cortex. Significant  
506 comparisons are represented in **bold**. Since amplitude is our main endpoint, its  $P_{\text{critical}}$  is set to  
507 0.006, while for slope  $P_{\text{critical}}$  is 0.05.

508

509 Once these two participants were removed from the analyses, the general interpretation does not  
510 change: the effect of region is still present, with amplitude higher in frontal regions than in parietal



511 regions. Critically, pairwise differences are exactly the same (as before, no significance of parietal  
 512 cortex; compare **Table 3** and **Table A6**), so that it is just a region-specific effect, with an  
 513 unexpected higher cortical excitability in light sedation. However, there are minor differences to  
 514 what it is reported in the main text concerning the interaction between region and condition for the  
 515 amplitude, the effect of DEX concentration for the slope, and the effect of the region over the  
 516 positive latency. The two subjects who showed the strongest effect had a significant effect over the  
 517 frontal cortex. If we observe instead the effect of DEX blood concentration over the slope, we can  
 518 appreciate an effect that was not present before. However, given that the DEX concentration  
 519 changes according to the condition, it is not surprising. Finally, we see here an effect of region to  
 520 the positive latency. As said in the discussion, every region creates different evoked potential when  
 521 stimulated, that thus creates a specific TEP for that region. So, even if beyond the scope of our  
 522 paper, it is reasonable that the positive latency changes, as the negative one did.

523

| Dependent Variables       | Independent variable   |                                      |
|---------------------------|------------------------|--------------------------------------|
|                           | Electric field (V/m)   | Electrode Distance (mm)              |
| Amplitude                 | Z = 1.595<br>P = 0.111 | <b>Z = 2.211</b><br><b>P = 0.027</b> |
| Slope                     | Z = 1.305<br>P = 0.192 | Z = 1.732<br>P = 0.083               |
| Latency of negative peak* | Z = /<br>P = /         | Z = 1.122<br>P = 0.262               |
| Latency of positive peak  | Z = 0.721<br>P = 0.471 | Z = 1.422<br>P = 0.155               |

524 **Table A7:** Results of induced electric field caused by the TMS, and the distance of the electrode  
 525 from the hotspot, for the four measures of cortical excitability. In **bold**, significant results, and in  
 526 *italics* tendencies. Note that the induced electric field is not significant for amplitude (P = 0.009) as

- 527 it is the primary endpoint and we have corrected for multiple comparison ( $P_{\text{critical}} = 0.006$ ). SPSS
- 528 reported that induced electric field was redundant for the negative peak and gave no results for it.

## 529 References

- 530 1. Bonhomme V, Staquet C, Montupil J, et al. General Anesthesia: A Probe to Explore  
531 Consciousness. *Front Syst Neurosci* [Internet] Frontiers Media SA; 2019 [cited 2019 Oct 4];  
532 **13**: 36 Available from: <http://www.ncbi.nlm.nih.gov/pubmed/31474839>
- 533 2. Sarasso S, Boly M, Napolitani M, et al. Consciousness and complexity during  
534 unresponsiveness induced by propofol, xenon, and ketamine. *Curr Biol* [Internet] Elsevier;  
535 2015; **25**: 3099–105 Available from: <http://dx.doi.org/10.1016/j.cub.2015.10.014>
- 536 3. Bonhomme V, Vanhaudenhuyse A, Demertzi A, et al. Resting-state Network-specific  
537 Breakdown of Functional Connectivity during Ketamine Alteration of Consciousness in  
538 Volunteers. *Anesthesiology* Lippincott Williams and Wilkins; 2016; **125**: 873–88
- 539 4. Darracq M, Funk CM, Polyakov D, et al. Evoked Alpha Power is Reduced in Disconnected  
540 Consciousness During Sleep and Anesthesia. *Sci Rep* [Internet] Springer US; 2018; **8**: 16664  
541 Available from: <http://www.nature.com/articles/s41598-018-34957-9>
- 542 5. Evered L, Silbert B, Knopman DS, et al. Recommendations for the nomenclature of  
543 cognitive change associated with anaesthesia and surgery—2018 [Internet]. *Br. J. Anaesth.*  
544 Elsevier Ltd; 2018 [cited 2020 Aug 29]. p. 1005–12 Available from:  
545 <https://doi.org/10.1016/j.bja.2017.12.029>.
- 546 6. Zhang J, Yu Y, Miao S, et al. Effects of peri-operative intravenous administration of  
547 dexmedetomidine on emergence agitation after general anesthesia in adults: a meta-analysis  
548 of randomized controlled trials. *Drug Des Devel Ther* 2019; **13**: 2853–64
- 549 7. Duan X, Coburn M, Rossaint R, Sanders RD, Waesberghe J V, Kowark A. Efficacy of  
550 perioperative dexmedetomidine on postoperative delirium: systematic review and meta-  
551 analysis with trial sequential analysis of randomised controlled trials. *Br J Anaesth* England;  
552 2018; **121**: 384–97
- 553 8. Djaiani G, Silverton N, Fedorko L, et al. Dexmedetomidine versus Propofol Sedation

- 554 Reduces Delirium after Cardiac Surgery: A Randomized Controlled Trial. *Anesthesiology*  
555 Lippincott Williams and Wilkins; 2016; **124**: 362–8
- 556 9. Purdon PL, Sampson A, Pavone KJ, Brown EN. Clinical electroencephalography for  
557 anesthesiologists. *Anesthesiology*. Lippincott Williams and Wilkins; 2015. p. 937–60
- 558 10. Yu X, Franks NP, Wisden W. Sleep and Sedative States Induced by Targeting the Histamine  
559 and Noradrenergic Systems. *Front Neural Circuits* [Internet] 2018 [cited 2019 Feb 4]; **12**  
560 Available from: [www.frontiersin.org](http://www.frontiersin.org)
- 561 11. Guldenmund P, Vanhaudenhuyse A, Sanders RD, et al. Brain functional connectivity  
562 differentiates dexmedetomidine from propofol and natural sleep. *Br J Anaesth* [Internet] The  
563 Author(s); 2017 [cited 2019 Nov 23]; **119**: 674–84 Available from:  
564 <http://dx.doi.org/10.1093/bja/aex257>
- 565 12. Akeju O, Loggia ML, Catana C, et al. Disruption of thalamic functional connectivity is a  
566 neural correlate of dexmedetomidine-induced unconsciousness. *Elife* eLife Sciences  
567 Publications Ltd; 2014; **3**: 1–23
- 568 13. Hashmi JA, Loggia ML, Khan S, et al. Dexmedetomidine Disrupts the Local and Global  
569 Efficiencies of Large-scale Brain Networks. *Anesthesiology* [Internet] Lippincott Williams  
570 and Wilkins; 2017 [cited 2020 Aug 29]; **126**: 419–30 Available from:  
571 <https://pubmed.ncbi.nlm.nih.gov/28092321/>
- 572 14. Kallionpää RE, Scheinin A, Kallionpää RA, et al. Spoken words are processed during  
573 dexmedetomidine-induced unresponsiveness. *Br J Anaesth* Elsevier Ltd; 2018; **121**: 270–80
- 574 15. Akeju O, Kim SE, Vazquez R, et al. Spatiotemporal dynamics of dexmedetomidine-induced  
575 electroencephalogram oscillations. *PLoS One* Public Library of Science; 2016; **11**
- 576 16. Scheinin A, Kallionpää RE, Li D, et al. Differentiating drug-related and state-related effects  
577 of dexmedetomidine and propofol on the electroencephalogram. *Anesthesiology* Lippincott  
578 Williams and Wilkins; 2018; **129**: 22–36
- 579 17. Sleigh JW, Vacas S, Flexman AM, Talke PO. Electroencephalographic arousal patterns

- 580 under dexmedetomidine sedation. *Anesth Analg* Lippincott Williams and Wilkins; 2018; **127**:  
581 951–9
- 582 18. Massimini M, Ferrarelli F, Murphy MJ, et al. Cortical reactivity and effective connectivity  
583 during REM sleep in humans. *Cogn Neurosci* [Internet] NIH Public Access; 2010 [cited  
584 2019 Sep 18]; **1**: 176–83 Available from: <http://www.ncbi.nlm.nih.gov/pubmed/20823938>
- 585 19. Huber R, Mäki H, Rosanova M, et al. Human cortical excitability increases with time awake.  
586 *Cereb Cortex* [Internet] 2013 [cited 2019 May 31]; **23**: 332–8 Available from:  
587 <https://www.ncbi.nlm.nih.gov/pmc/articles/PMC3539451/pdf/bhs014.pdf>
- 588 20. Ly JQM, Gaggioni G, Chellappa SL, et al. Circadian regulation of human cortical  
589 excitability. *Nat Commun* [Internet] 2016; **7**: 11828 Available from:  
590 <http://www.nature.com/doi/10.1038/ncomms11828>
- 591 21. Massimini M, Ferrarelli F, Huber R, Esser SK. Breakdown of Cortical Effective  
592 Connectivity During Sleep. *Science (80- )* 2005; **309**: 2228–33
- 593 22. Cardone P, Van Egroo M, Chylinski D, Narbutas J, Gaggioni G, Vandewalle G. Increased  
594 cortical excitability but stable effective connectivity index during attentional lapses. *Sleep*  
595 [Internet] 2020 [cited 2020 Dec 29]; Available from:  
596 <https://academic.oup.com/sleep/advance-article/doi/10.1093/sleep/zsaa284/6046202>
- 597 23. Dyck JB, Maze M, Haack C, Azarnoff DL, Vuorilehto L, Shafer SL. Computer-controlled  
598 infusion of intravenous dexmedetomidine hydrochloride in adult human volunteers.  
599 *Anesthesiology* 1993; **78**: 821–8
- 600 24. Malviya S, Voepel-Lewis T, Tait AR, Merkel S, Tremper K, Naughton N. Depth of sedation  
601 in children undergoing computed tomography: validity and reliability of the University of  
602 Michigan Sedation Scale (UMSS). *Br J Anaesth* [Internet] 2002 [cited 2019 Nov 23]; **88**:  
603 241–5 Available from: <https://linkinghub.elsevier.com/retrieve/pii/S0007091217365352>
- 604 25. Ramsay MAE, Savege TM, Simpson BRJ, Goodwin R. Controlled Sedation with  
605 Alphaxalone-Alphadolone. *Br Med J* 1974; **2**: 656–9

- 606 26. Rosanova M, Fecchio M, Casarotto S, et al. Sleep-like cortical OFF-periods disrupt causality  
607 and complexity in the brain of unresponsive wakefulness syndrome patients. *Nat Commun*  
608 [Internet] Nature Publishing Group; 2018 [cited 2019 Sep 18]; **9**: 4427 Available from:  
609 <http://www.nature.com/articles/s41467-018-06871-1>
- 610 27. Sachdev RNS, Ebner FF, Wilson CJ. Effect of subthreshold up and down states on the  
611 whisker-evoked response in somatosensory cortex. *J Neurophysiol* [Internet] J Neurophysiol;  
612 2004 [cited 2021 Apr 25]; **92**: 3511–21 Available from:  
613 <https://pubmed.ncbi.nlm.nih.gov/15254074/>
- 614 28. Wörgötter F, Suder K, Zhao Y, Kerscher N, Eysel UT, Funke K. State-dependent receptive-  
615 field restructuring in the visual cortex. *Nature* [Internet] Nature Publishing Group; 1998  
616 [cited 2021 Apr 25]; **396**: 165–8 Available from: [www.nature.com](http://www.nature.com)
- 617 29. Bazhenov M, Timofeev I, Steriade M, Sejnowski TJ. Model of thalamocortical slow-wave  
618 sleep oscillations and transitions to activated states. *J Neurosci* [Internet] Society for  
619 Neuroscience; 2002 [cited 2021 Apr 25]; **22**: 8691–704 Available from:  
620 <https://pubmed.ncbi.nlm.nih.gov/12351744/>
- 621 30. Hill S, Tononi G. Modeling sleep and wakefulness in the thalamocortical system. *J*  
622 *Neurophysiol* [Internet] J Neurophysiol; 2005 [cited 2021 Apr 25]; **93**: 1671–98 Available  
623 from: <https://pubmed.ncbi.nlm.nih.gov/15537811/>
- 624 31. Noreika V, Kamke M, Canales-Johnson A, Chennu S, Bekinschtein T, Mattingley J.  
625 Alertness fluctuations during task performance modulate cortical evoked responses to  
626 transcranial magnetic stimulation. *Neuroimage* [Internet] 2020 [cited 2020 Sep 2]; 155754  
627 Available from: <https://linkinghub.elsevier.com/retrieve/pii/S1053811920307916>
- 628 32. Boly M, Massimini M, Tsuchiya N, Postle BR, Koch C, Tononi G. Are the Neural Correlates  
629 of Consciousness in the Front or in the Back of the Cerebral Cortex? Clinical and  
630 Neuroimaging Evidence. *J Neurosci* [Internet] Society for Neuroscience; 2017 [cited 2019  
631 Sep 6]; **37**: 9603–13 Available from: <https://www.jneurosci.org/content/37/40/9603>

- 632 33. Ziemann U. TMS and drugs. Clin. Neurophysiol. Elsevier; 2004. p. 1717–29
- 633 34. Tran DMD, McNair NA, Harris JA, Livesey EJ. Expected TMS excites the motor system  
634 less effectively than unexpected stimulation. *Neuroimage* Academic Press Inc.; 2021; **226**:  
635 117541
- 636 35. Darmani G, Bergmann TO, Zipser C, Baur D, Müller-Dahlhaus F, Ziemann U. Effects of  
637 antiepileptic drugs on cortical excitability in humans: A TMS-EMG and TMS-EEG study.  
638 *Hum Brain Mapp* 2019; **40**: 1276–89
- 639 36. Fecchio M, Pigorini A, Comanducci A, et al. The spectral features of EEG responses to  
640 transcranial magnetic stimulation of the primary motor cortex depend on the amplitude of the  
641 motor evoked potentials. *PLoS One* 2017; **12**: 1–15
- 642 37. Rosanova M, Casali A, Bellina V, Resta F, Mariotti M, Massimini M. Natural frequencies of  
643 human corticothalamic circuits. *J Neurosci* [Internet] 2009 [cited 2020 May 12]; **29**: 7679–85  
644 Available from: [www.jneurosci.org](http://www.jneurosci.org)
- 645 38. Herring JD, Thut G, Jensen O, Bergmann TO. Attention modulates TMS-locked alpha  
646 oscillations in the visual cortex. *J Neurosci* 2015; **35**: 14435–47
- 647 39. Bergmann TO, Molle M, Schmidt MA, et al. EEG-Guided Transcranial Magnetic  
648 Stimulation Reveals Rapid Shifts in Motor Cortical Excitability during the Human Sleep  
649 Slow Oscillation. *J Neurosci* 2012; **32**: 243–53
- 650 40. Shin H, Law R, Tsutsui S, Moore CI, Jones SR. The rate of transient beta frequency events  
651 predicts behavior across tasks and species. *Elife* [Internet] 2017 [cited 2019 Jun 17]; **6**  
652 Available from: <https://doi.org/10.7554/eLife.29086.001>
- 653 41. Ballesteros JJ, Briscoe JB, Ishizawa Y. Neural signatures of  $\alpha 2$ -adrenergic agonist-induced  
654 unconsciousness and awakening by antagonist. *Elife* [Internet] 2020; **9**: 1–18 Available from:  
655 <https://elifesciences.org/articles/57670>
- 656 42. Sanders RD, Tononi G, Laureys S, Sleigh JW. Unresponsiveness  $\neq$  unconsciousness.  
657 *Anesthesiology*. 2012. p. 946–59

- 658 43. Xi C, Sun S, Pan C, Ji F, Cui X, Li T. Different effects of propofol and dexmedetomidine  
659 sedation on electroencephalogram patterns: Wakefulness, moderate sedation, deep sedation  
660 and recovery. *PLoS One* Public Library of Science; 2018; **13**  
661
